# Supplementary material
Source: PubMed Central journal article supplement (PMC11191715)
Supplement: sj-pdf-1-jfm-10.1177_1098612X13477855.pdf [file sj-pdf-1-jfm-10.1177_1098612X13477855.pdf]

## Appendix

| Food Sampled                                                             | State of Purchase |         |         |
|--------------------------------------------------------------------------|-------------------|---------|---------|
|                                                                          | California        | Florida | Indiana |
| <b>Adult or All Life Stages</b>                                          |                   |         |         |
| Dry Food                                                                 |                   |         |         |
| Friskies Feline Favorites                                                | X                 | X       | X       |
| Iams Original with Chicken – 1+ years (ProActive Health)                 | X                 | X       | X       |
| Purina Cat Chow Complete Formula – formulated for cats of all ages       | X                 | X       | X       |
| Science Diet Adult Original – 1-6 years                                  | X                 | X       | X       |
| Pouched Food                                                             |                   |         |         |
| Nutro Complete Care – Adult – Oceanfish & Shrimp Formula Chunks in Sauce | X                 | X       | X       |
| Nutro Complete Care – Adult – Chicken & Giblets Formula Chunks in Gravy  | X                 | X       | X       |
| Science Diet Tender Chunks in Gravy – Real Chicken Dinner – Adult        | N/A               | N/A     | X       |
| Science Diet Tender Chunks in Gravy – Real Ocean Fish Dinner – Adult     | X                 | X       | N/A     |
| Whiskas Choice Cuts Chicken Dinner in Gravy                              | X                 | X       | X       |
| Whiskas Choice Cuts with Poached Salmon in Sauce                         | X                 | X       | N/A     |
| Whiskas Purrfectly Fish – Oceanfish Entree                               | X                 | N/A     | N/A     |
| Canned Food                                                              |                   |         |         |
| Fancy Feast Chicken Feast                                                | X                 | X       | X       |
| Fancy Feast Grilled Chicken Feast in Gravy                               | X                 | X       | X       |
| Fancy Feast Grilled Ocean Whitefish & Tuna Feast in Gravy                | X                 | X       | X       |
| Fancy Feast Grilled Salmon Feast in Gravy                                | X                 | X       | N/A     |
| Fancy Feast Ocean Whitefish & Tuna Feast                                 | X                 | X       | X       |
| Fancy Feast Savory Salmon Feast                                          | X                 | X       | X       |
| Friskies Classic Seafood Entrée – Classic Paté (5.5 oz)                  | X                 | X       | X       |
| Friskies Turkey & Giblets Dinner – Special Diet Classic Paté (5.5 oz)    | X                 | X       | X       |
| Priority/Marsh Chicken Dinner (local supermarket brands)                 | X                 | N/A     | X       |
| Priority/Marsh Salmon Dinner (local supermarket brands)                  | X                 | N/A     | X       |
| Iams Premium Pate with Country Style Turkey & Giblets – Adult            | X                 | X       | X       |
| Iams Premium Pate with Gourmet Chicken – Adult                           | X                 | X       | X       |
| Iams Premium Pate with Succulent Seafood Sampler – Adult                 | X                 | X       | X       |
| Iams Premium Pate with Tender Chicken & Liver – Adult                    | X                 | X       | X       |
| Science Diet Minced Indoor Cat Seafood Entrée – Adult                    | X                 | X       | X       |
| Science Diet Minced Gourmet Turkey Entrée – Adult                        | X                 | X       | X       |
| Science Diet Minced Liver & Chicken Entrée – Adult                       | X                 | X       | X       |
| Science Diet Minced Indoor Cat Chicken Entrée – Adult                    | X                 | X       | X       |
| <b>Kitten Foods</b>                                                      |                   |         |         |
| Dry Food                                                                 |                   |         |         |
| Nutro Kitten                                                             | X                 | N/A     | N/A     |
| Pouched Food                                                             |                   |         |         |
| Science Diet Tender Chunks in Gravy – Real Beef Dinner – Kitten          | X                 | X       | N/A     |
| Science Diet Tender Chunks in Gravy – Real Chicken Dinner – Kitten       | X                 | X       | N/A     |
| Canned Food                                                              |                   |         |         |
| Nutro Kitten                                                             | X                 | N/A     | N/A     |
| <b>“Therapeutic” Foods</b>                                               |                   |         |         |
| Dry Food                                                                 |                   |         |         |
| Prescription Diet Feline c/d                                             | X                 | X       | X       |
| Prescription Diet Feline r/d                                             | N/A               | X       | X       |
| Prescription Diet Feline k/d                                             | X                 | X       | X       |
| Prescription Diet Feline w/d                                             | X                 | N/A     | N/A     |

| Food Sampled                                                          | State of Purchase |         |         |
|-----------------------------------------------------------------------|-------------------|---------|---------|
|                                                                       | California        | Florida | Indiana |
| Canned Food                                                           |                   |         |         |
| Prescription Diet Feline c/d                                          | X                 | X       | X       |
| Prescription Diet Feline k/d                                          | X                 | X       | X       |
| Prescription Diet Feline w/d                                          | X                 | N/A     | N/A     |
| Purina Pro Plan Adult Cat Urinary Tract Health Formula Chicken Entrée | X                 | N/A     | X       |
| Purina Veterinary Diets CV – Cardiovascular                           | X                 | N/A     | X       |
| Purina Veterinary Diets DM – Diabetes Management                      | X                 | X       | X       |
| Purina Veterinary Diets NF – Kidney Function                          | X                 | N/A     | X       |
| Purina Veterinary Diets OM – Overweight Management                    | N/A               | X       | N/A     |
| Purina Veterinary Diets UR – Urinary                                  | N/A               | X       | N/A     |
| Royal Canin Urinary SO                                                | N/A               | X       | N/A     |

N/A: not available
